# Supplementary material for: TP53 mutations emerge with HDM2 inhibitor SAR405838 treatment in de-differentiated liposarcoma
Source: PubMed Central journal article supplement (PMC5013668; doi:10.1038/ncomms12609), 2016-08-31
Supplement: ncomms12609-s1.pdf [file ncomms12609-s1.pdf]

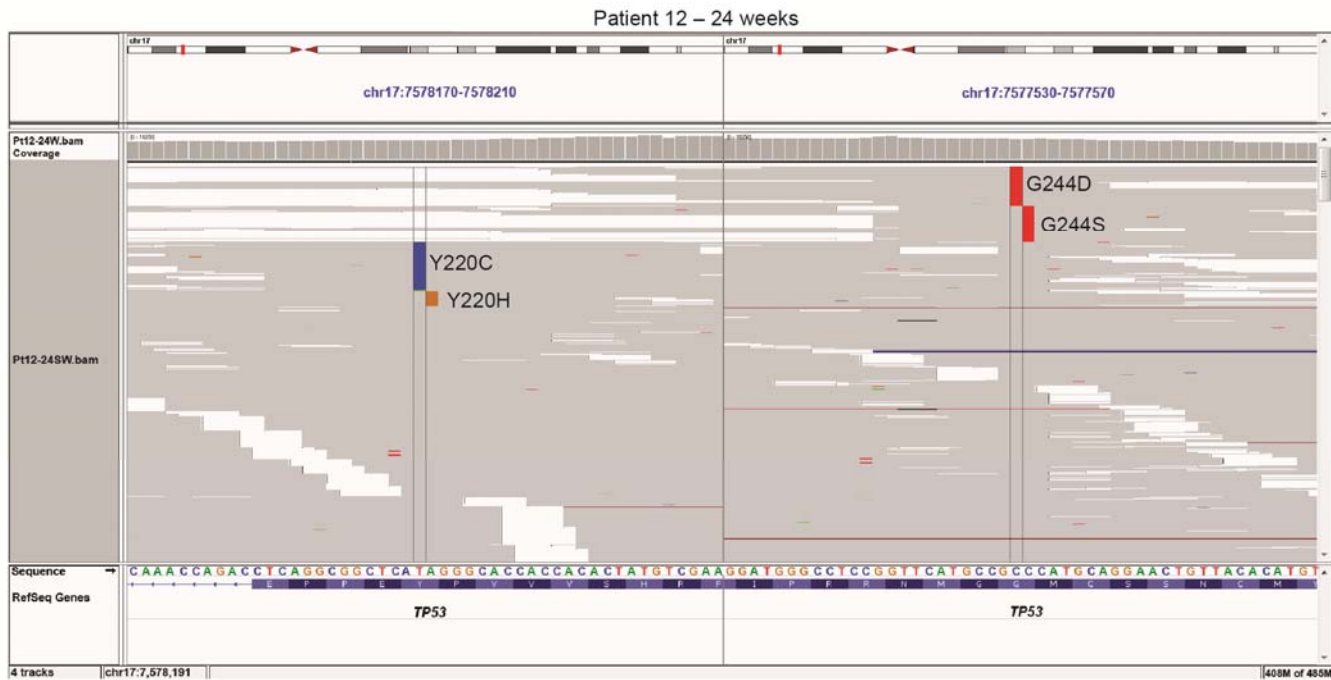

**Supplementary Figure 1: IGV view of multiple variants within the 24-week cfDNA sample from patient 12**

Blue, brown and red colors indicate sequencing reads containing a *TP53* variant within the sequencing alignment. Variants affecting neighboring bases are not on the same DNA strand, suggesting that these variants originated from separate clones in the tumor.

IGV, integrative genomics viewer.

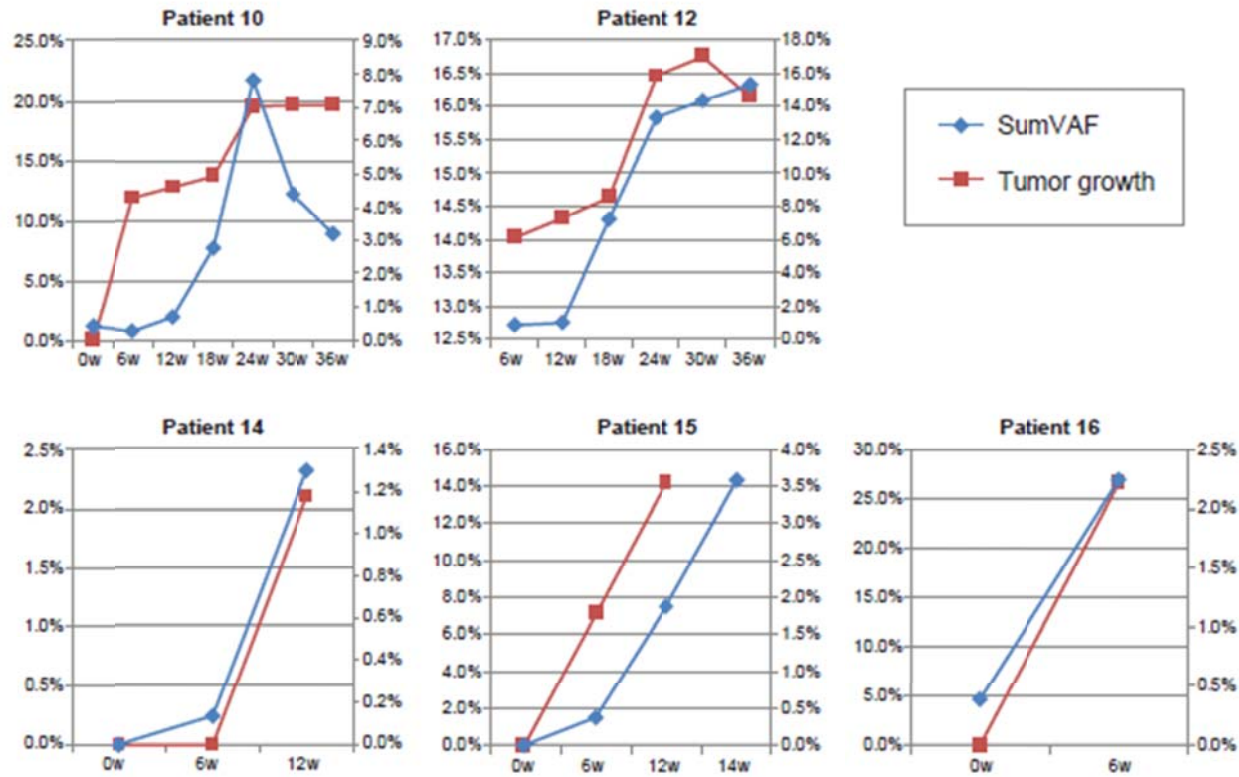

**Supplementary Figure 2: Comparison of tumor growth and total *TP53* mutation burden in cfDNA**

Tumor growth is presented as percentage change in tumor size by computed tomography measurement relative to baseline measurement (Y axis 1, left). Total *TP53* mutation burden is sum of all *TP53* variant allelic fractions (VAF; Y axis 2, right). X axis represents time on treatment (weeks).

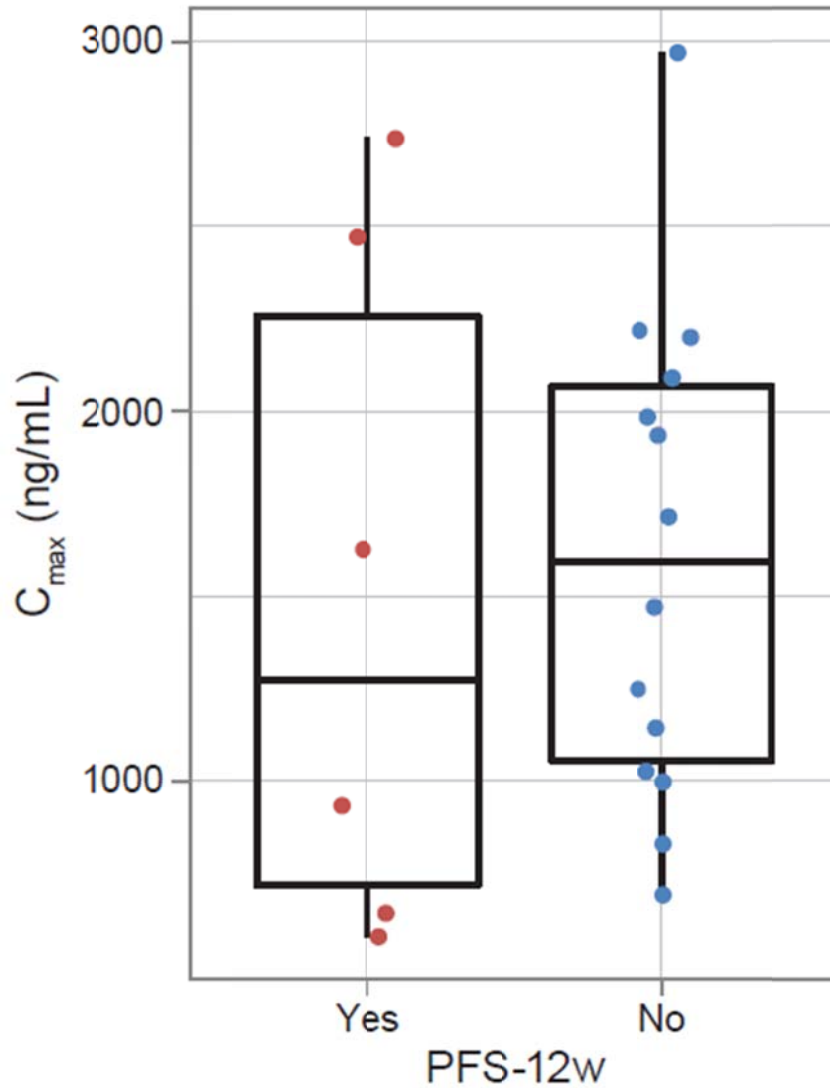

**Supplementary Figure 3: Comparison of  $C_{max}$  at baseline (Cycle 1, Day 1) for patients with and without progression-free survival at 12 weeks (PFS-12w)**

Box plots with actual data points are shown ( $n = 20$ ). Center line indicates median value.

Bottom and top of the whiskers represent the smallest and largest non-outlier values

respectively. Lower and top end of the box indicate the 1<sup>st</sup> and 3<sup>rd</sup> quartile respectively.

**Supplementary Figure 4: cfDNA yields in patients with DDLPS receiving SAR2405838**

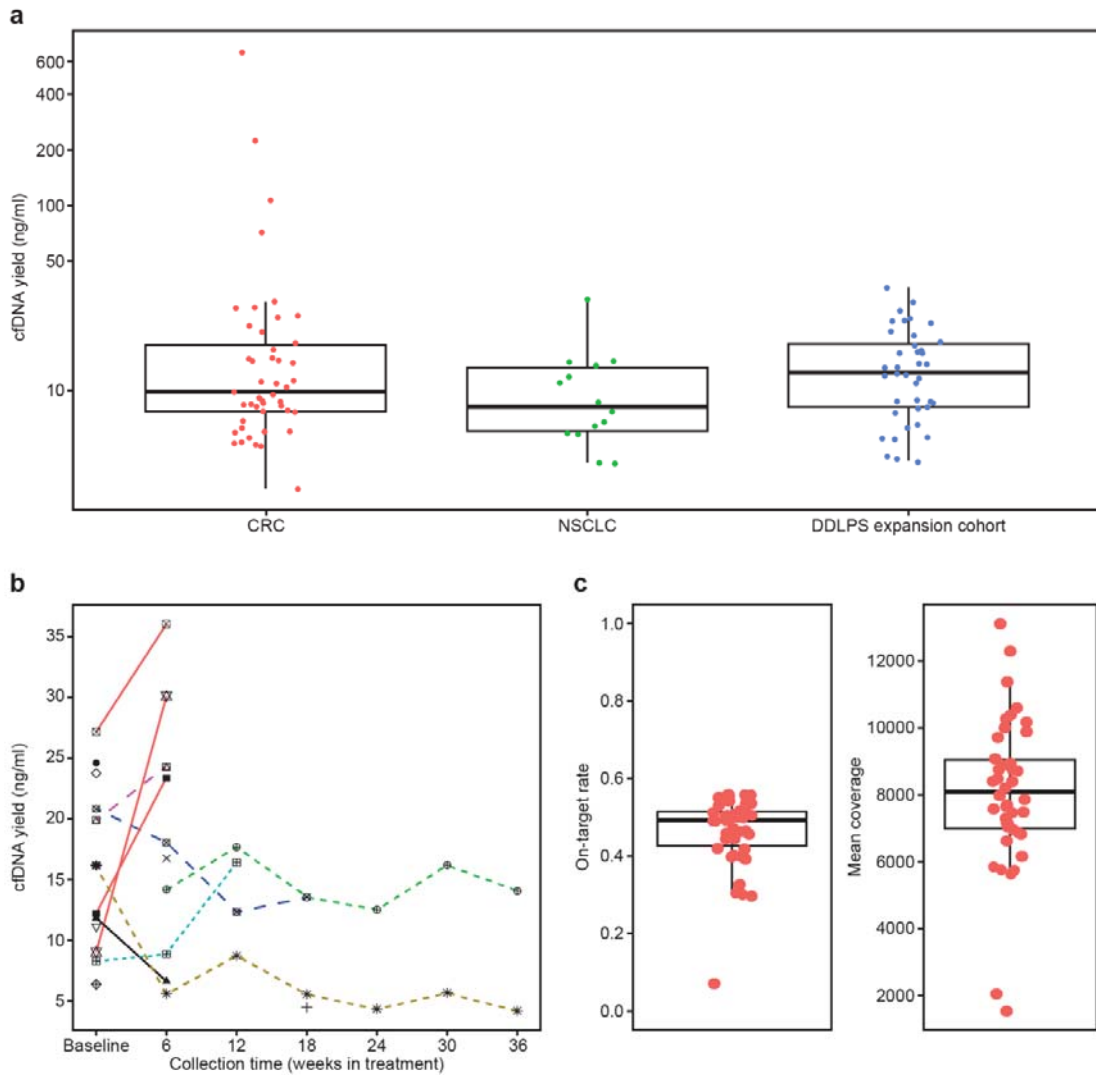

(a) Plasma cfDNA was isolated from patients participating in the DDLPS expansion cohort. The cfDNA yield was similar to that observed in the 60 matched CRC and NSCLC tumor and plasma pairs. Box plots with actual data points are shown. CRC, colorectal cancer (n = 46); DDLPS, de-differentiated liposarcoma (n = 39); NSCLC, non-small cell lung cancer (n = 14).

(b) The plasma cfDNA yield from patients participating in the DDLPS expansion cohort did not consistently increase or decrease over time.

(c) cfDNA sequencing QC results from the DDLPS expansion cohort suggest that most libraries met our targets of 40% on-target rate and 8000X mean sequence coverage. Box plots with actual data points are shown (n = 39).

cfDNA, cell-free DNA; CRC, colorectal cancer; DDLPS, de-differentiated liposarcoma; NSCLC, non-small cell lung cancer.



## Supplementary Table 2: TP53 probe sequences

Hs\_TP53\_e1\_1 /5Biosg/TGTCCAGCTTTGTGCCAGGACCTCGCAGGGGTTGATGGGATTGGGGTTTTCCCTCCCATGTGCTCAAGACTGGCGCTAAAAGTTTTGAGCTTCTCAAAGTCTAGAGCCACCCTCCAG  
Hs\_TP53\_e1\_2 /5Biosg/GGAGCAGGTAGCTGCTGGGCTCCGGGGACACTTTGCGTTCGGGCTGGGAGCGTGCTTCCACGACGGTGACACGCTTCCCTGGATTGGGTAAGCTCCTGACTGAACTTGATGAGTCCCT  
Hs\_TP53\_e2\_1 /5Biosg/GGCCCAGGTGACCCAGGGTTGGAAGTGTCTCATGCTGGATCCCACTTTTCTCTTTCAGCAGCAGCAGACTGCCCTCCGGGCTACTGCCATGGAGGAGCCGAGTCAGATCCTAGCGTCGA  
Hs\_TP53\_e2\_2 /5Biosg/GCCCCCTCTGAGTCAGGAAACATTTTCAGACCTATGAAACTGTGAGTGGATCCATTTGAAAGGGCAGGCCACCACCCCAACCCAGCCCCCTAGCAGAGACCTGTGGAAAGCG  
Hs\_TP53\_e2\_3 /5Biosg/AAAATTCATGGGACTGACTTTCTGCTCTTTCAGACTTCTGAAACAACCTTCTGTAAGGACAAGGGTTGGGCTGGGACCTGGAGGGCTGGGACCTGGAGGGCTGGGGGGC  
Hs\_TP53\_e3\_1 /5Biosg/GAGGACCTGGTCCCTGACTGCTCTTTTACCACATCAGACTCCCTTCCGCTCCCAAGCAATGGATGATTTGATGCTGCTCCCGGACGATATTGAACAATGGTCTACTGAAGACCAG  
Hs\_TP53\_e3\_2 /5Biosg/GTCCAGATGAAGCTCCAGAATGCCAGAGGCTGCTCCCCCTGGGCCCTGCACAGCAGCTCCTACACCGCGGCCCTGCACAGCCCTCTCGGCCCTGTCATCTTCTGCTCCCT  
Hs\_TP53\_e3\_3 /5Biosg/CCCAGAAAACCTACCAGGGCAGCTACGGTTCCGCTCTGGGCTTCTTGCACTTGGGACAGCAAGTCTGTGACTTGCACGGTCAGTTGCCCTGAGGGGCTGGCTCCATGAGACTTCAAT  
Hs\_TP53\_e4\_1 /5Biosg/GCTGAGGTGGGAAGATCACTTGAGGCCAGGAGATGGAGGCTCAGTGTGATCAGCAGCTGTGCTCCAGCTGAGTGACAGAGCAAGACCCCTATCTCAAAAAAAAAAAAAAAAA  
Hs\_TP53\_e4\_2 /5Biosg/GAAAAGCTCCTGAGGTGTAGACGCCAATCTCTAGCTCGCTAGTGGGTTGCGAGAGGTGCTTACGCATGTTGTTTCTTTCGCTGCCCTTCCAGTTGCTTATCTGTTCACTGTGTC  
Hs\_TP53\_e4\_3 /5Biosg/CCTGACTTTCAACTGCTCTCTCTCTCTTCTTCCACAGTACTCCCTGCCCCTCAACAAGATGTTTTCGCAACTGGCCAAAGCTGCCCTGTGAGCTGTGGGTTGATCCACACCCCGCC  
Hs\_TP53\_e4\_4 /5Biosg/CGGCACCCCGCTCCGCGCCATGGCCATCTACAAGCAGTACACAGCAGTACGAGGAGTTGTGAGGCGCTGCCCCACCATGAGCGCTGCTCAGATAGCAGTGGTGGAGCAGCTGGGGCTGGA  
Hs\_TP53\_e5\_1 /5Biosg/TTAGGTCTGGCCCTCTCAGCATCTATCCGAGTGGAAAGAAATTTGCGTGTGGAGTATTGGATGACAGAAACACTTTTCGACATAGTGTGGTGGCCCTATGAGCCGCTGAGGT  
Hs\_TP53\_e6\_1 /5Biosg/TCTAGGTGGCTCTGACTGTACCACCATCCACTACAACACTACATGTGTAACAGTTCCTGCATGGGCGGCATGAACCGGAGGCCATCTCACCATCATCACTGGAAGACTCCAGGTCA  
Hs\_TP53\_e7\_1 /5Biosg/TAGGACTGATTTCCTACTGCCTCTTCTCTCTTTTCTTCTCTGAGTGTGTAATCTACTGGGACGGAACAGCTTTGAGGTGCGTGTGTTGCTGCTCCTGGAGAGACCGGGCGCA  
Hs\_TP53\_e7\_2 /5Biosg/CAGAGGAAGAAATCTCCGCAAGAAAGGGGAGCCTACCACGAGCTGCCCCAGGAGCACTAAGCGAGTAAGCAAGCAGGACAAGAGCGGTGAGGAGAGCAAGGTGAGTATGAG  
Hs\_TP53\_e8\_1 /5Biosg/CACCTTTCTTGGCTCTTTCTAGCACTGCCAACACACAGCTCCTCTCCCAAGCAAGAAAGAAACACTGGATGGAAATATTTACCCCTCAGGTACTAAGTCTTGGGACCTCT  
Hs\_TP53\_e9\_1 /5Biosg/TTGTAGCTAACTAATTCAGAACACCACTTATACCATAATATATATTTAAAGGACCAGCAGCTTTCAAAAAGAAATTTGTAAGAGAGCATGAAAATGGTCTATGACTTTGCGCT  
Hs\_TP53\_e9\_2 /5Biosg/GATACAGATGCTACTTGACTTACGATGGTACTTCTGATAAACTCGTCTAAGTAAAGTAAATTTGTAAGTAAAGTAAATTAATACACCTAATCTAAGGAACATCATAGCTTAGC  
Hs\_TP53\_e10\_1 /5Biosg/GCTGCAGATCCGTTGGCGTGAGCGCTTCCGAGATGTTCCGAGAGCTGAATGAGGCTTGGAACTCAAGGATGCCAGGCTGGGAAGGAGCCAGGGGGAGCAGGGCTCACTCCAGGTGAGT  
Hs\_TP53\_e11\_1 /5Biosg/CTTCTGTCTCCTACAGCCACCTGAAGTCCAAAAGGGTCACTTACCCTCCCGCATAAAAAACTCATGTTCAAGACAGAAGGGCTGACTCAGACTGACACTTCCACTTCTTGTCCCC  
Hs\_TP53\_e11\_2 /5Biosg/ACTGACAGCCTCCACCCCATCTCTCCCTCCCTGCCATTTTGGGTTTTGGGCTTTGAAACCTTGCCTGCAATAGTGTGCGTCAGAAAGCACCAGGACTTCCATTTGCTTTGCTCCG  
Hs\_TP53\_e11\_3 /5Biosg/GGGCTCCACTGAACAAGTTGGCCTGCAGTGGTGTGTTGTTGGGGAGGAGGATGGGAGTAGGACATACCAGCTTAGATTTAAGGTTTTACTGTGAGGGATGTTGGGAGATGTAAG  
Hs\_TP53\_e11\_4 /5Biosg/AAATGTTCTTGCAGTTAAGGGTTAGTTTACAATCAGCCACATCTAGGTAGGGGCCACTTCCAGCTACTAACCAGGAAAGCTGCCCTCACTGTGAAATTTCTCAACTTCAAGGCC  
Hs\_TP53\_e11\_5 /5Biosg/ATATCTGTGAAATGCTGGCATTGACACCTACCTCAGAGTGCATTTGAGGGTAAATGAAATATGTAGATCTGGCCTTGAACCCACTTTTATACATGGGGTCTAGAAGTTGACCCC  
Hs\_TP53\_e11\_6 /5Biosg/CTTGGAGGGTCTGTTCCCTCTCCCTGTTGGTCCGTTGGTGTGTTTCTACAGTTGGGACAGCTGGTATGAGGAGGAGTTGCAAGTCTGCTGGCCCAAGCAACCCCTGCTGAC  
Hs\_TP53\_e11\_7 /5Biosg/AACCTCTTGGTGAACCTTAGTACCTAAAAGGAAATCTCACCCATCCACACCCCTGGAGGATTTATCTCTTGTATATGATGATCTGGATCCACAAGACTGTTTATGCTCAGGGTCA  
Hs\_TP53\_e11\_8 /5Biosg/ATTTCTTTTTCTTTTTTTTTTTTTTTTTTTTTTTTCTTTTCTTTGAGACTGGGCTCGCTTTGTTGCCAGGCTGGAGTGGAGTGGCGTGATCTTGGCTTACTGCAGCCTTTGCCCTCCCGCT  
Hs\_TP53\_e11\_9 /5Biosg/CGAGCAGTCTGCCTCAGCTCCGGAGTACTGGGACCAGGTTATGCCACCATGGCCAGCCAACTTTTGCATTTTTGTAGAGATGGGGTCTCACAGTGTGCCAGGCTGGTCTCA  
Hs\_TP53\_e11\_10 /5Biosg/AACTCCTGGGCTCAGGCTACACCTGTCTCAGCTCCAGAGTGTGGGATTACAATTGTAGGCCACCAGCTCCAGCTGGAAGGTCACACTTTTTTACTTCTGCAAGCAGTCTGCA  
Hs\_TP53\_e11\_11 /5Biosg/TTTTCAACCCACCCCTCCCTCTCTCTCTTTTATATCCATTTTATATCGATCTTATTTTACAATAAACTTTGCTGCCACCTGTGTCTGAGGGTGAACGCCAGTGCAGGC
